# Supplementary material for: Altered Interoceptive Processing in Generalized Anxiety Disorder—A Heartbeat-Evoked Potential Research
Source: PubMed Central journal article supplement (PMC6739601; doi:10.3389/fpsyt.2019.00616), 2019-09-05
Supplement: Table_1.pdf [file Table_1.pdf]

2 - Since adjacent electrodes usually have somewhat correlated signals, the averaged 6-electrode signal is probably a better candidate for regression analysis using the Anxiety symptoms as predictors of the HEP.

The correlation result of averaged HEP amplitudes across selected electrodes is shown as follows (Table S1), which also found strong association between HEP amplitude under EC condition with anxiety symptoms. Unfortunately, none of these p values survived FDR procedure. Thus, we choose to provide correlation results of channels as stated in the previous comment.

Table S1.

|     |           | HAMA         | HAMA-<br>psychic | HAMA-<br>somatic | HAMD  | STAI-<br>trait | STAI-<br>state | TAS-<br>DIF | TAS-<br>DEF | TAS-<br>EOT |
|-----|-----------|--------------|------------------|------------------|-------|----------------|----------------|-------------|-------------|-------------|
| GAD | HEP.Close | <u>0.007</u> | <u>0.011</u>     | <u>0.025</u>     | 0.575 | 0.645          | 0.45           | 0.307       | 0.416       | 0.243       |
|     | HEP.Open  | 0.238        | 0.05             | 0.721            | 0.359 | 0.162          | 0.214          | 0.946       | 0.467       | 0.068       |
| HC  | HEP.Close | 0.624        | 0.542            | 0.724            | 0.373 | 0.628          | 0.935          | 0.416       | 0.092       | 0.156       |
|     | HEP.Open  | 0.347        | 0.058            | 0.591            | 0.427 | 0.938          | 0.475          | 0.982       | 0.601       | 0.386       |
